# Supplementary material for: Magnesium Improves Cardiac Function in Experimental Uremia by Altering Cardiac Elastin Protein Content
Source: MDPI journal article supplement (doi:10.3390/nu15061303), 2023-03-07
Supplement: s1 [file s1]

Supplementary Materials:

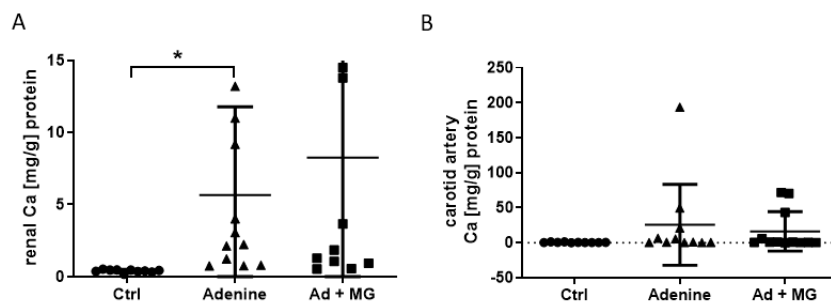

**Figure S1.** Calcium contents in kidney and carotid artery. (A) Total calcium content of kidney tissue [mg/g] normalized to total renal protein; (B) Total calcium content of carotid artery tissue [mg/g] normalized to total carotid artery protein; Ad: Adenine; Ca: Calcium; Ctrl: Control; MG: Magnesium; \*:  $p < 0.05$ .

**Table S1.** Serum biochemistry.

| A: At baseline               |               |                             |
|------------------------------|---------------|-----------------------------|
| Parameter at baseline        | Mean          | SD                          |
| Urea (mg/dL)                 | 18.99         | 3.43                        |
| Creatinine (mg/dL)           | 0.36          | 0.08                        |
| Phosphate (mg/dL)            | 8.24          | 0.68                        |
| Magnesium (mg/dL)            | 2.27          | 0.25                        |
| Calcium (mg/dL)              | 10.44         | 0.27                        |
| Protein (mg/dL)              | 6.52          | 0.43                        |
| B: At week 6                 |               |                             |
| Parameter at week 6          | Adenine       | Adenine + MgCO <sub>3</sub> |
| Creatinine, mg/dL (mean, SD) | 3.11 ± 1.55*  | 3.29 ± 0.7*                 |
| Urea, mg/dL (mean, SD)       | 46.19 ± 18*   | 49.11 ± 18.61*              |
| Phosphate, mg/dL (mean, SD)  | 11.91 ± 2.92* | 11.51 ± 3.45*               |
| Calcium, mg/dL (mean, SD)    | 11.66 ± 0.7 * | 11.96 ± 0.62*               |
| Magnesium, mg/dL (mean, SD)  | 4 ± 1.1*      | 5.14 ± 0.99 *#              |
| Protein, mg/dL (mean, SD)    | 5.35 ± 0.24*  | 5.51 ± 0.28*                |

\* Significant versus baseline. # Significant versus adenine.

**Table S2.** Blood pressure at baseline and at week 8.

| Blood pressure                       | Systole |    | Diastole |    |
|--------------------------------------|---------|----|----------|----|
|                                      | Mean    | SD | Mean     | SD |
| Baseline                             | 126     | 13 | 88       | 16 |
| Control, week 8                      | 133     | 21 | 90       | 21 |
| Adenine, week 8                      | 131     | 23 | 81       | 17 |
| Adenine + MgCO <sub>3</sub> , week 8 | 136     | 17 | 90       | 18 |

**Table S3:** Relative expression of collagen I and collagen IV mRNA to relative expression of GAPDH mRNA.

|                        | <b>Ctrl</b>            | <b>Adenine</b>         | <b>Adenine + MgCO<sub>3</sub></b> |
|------------------------|------------------------|------------------------|-----------------------------------|
| Collagen I, mean (SD)  | 1,356,287<br>(867,270) | 1,001,005<br>(607,969) | 2,070,345 (2,845,104)             |
| Collagen IV, mean (SD) | 49,084<br>(44,122)     | 269,731<br>(736052)    | 70,957 (64,635)                   |
